# Supplementary material for: Spatiotemporal scales of mode water transformation in the Sea of Oman
Source: Copernicus journal article supplement (doi:10.5194/egusphere-2025-3782), 2025-08-15
Supplement: Supplementary file 1 [file egusphere-2025-3782-supplement.pdf]

**Content:** Supplementary Figures S1-S2:

- Figure S1: Mode water definition: Potential vorticity (PV) vs. potential density criteria.
- Figure S2: Air-sea fluxes flag.

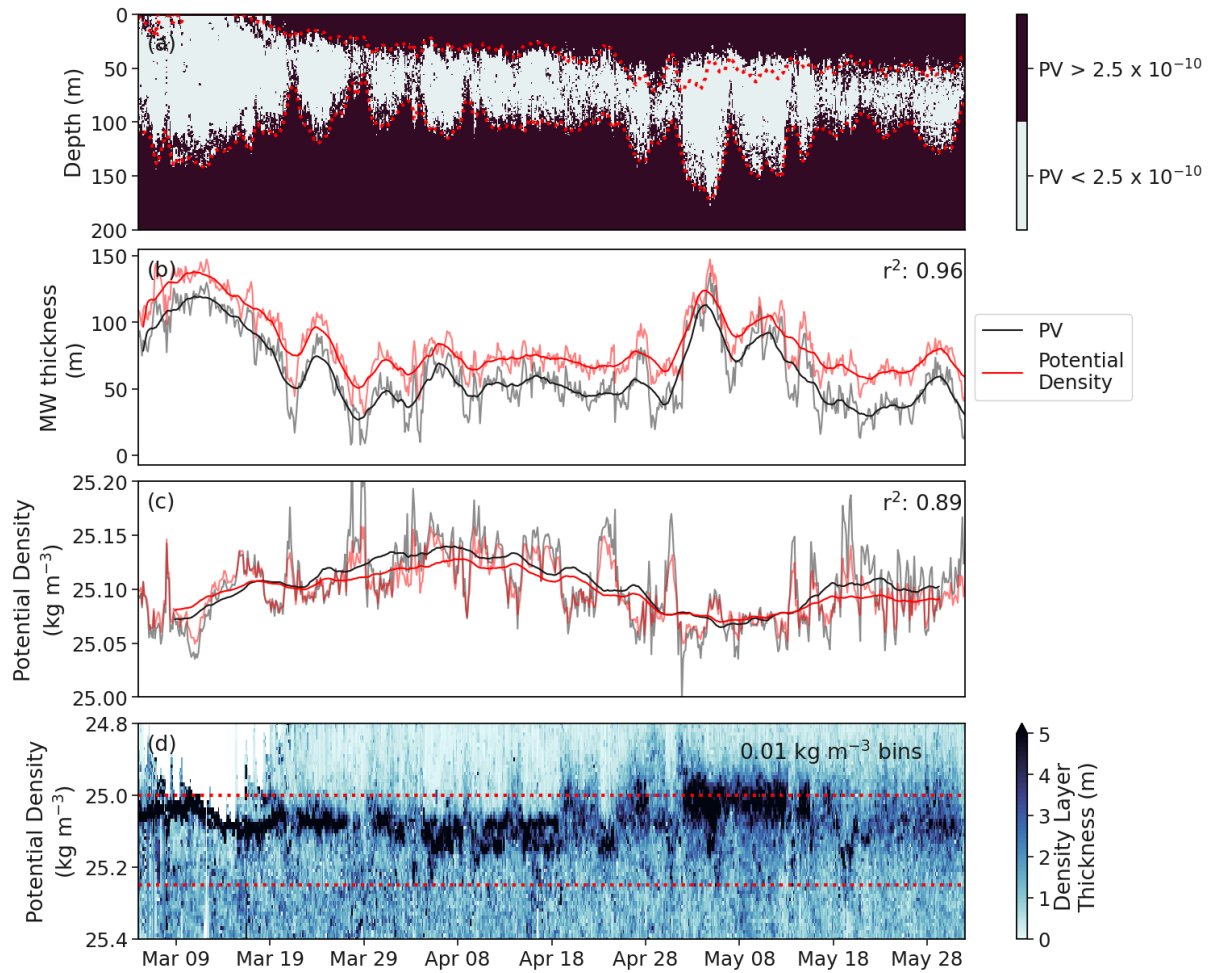

**Figure S1. Mode water definition: Potential vorticity (PV) vs. potential density criteria.** a) Ocean glider timeseries colored by PV smaller or larger than the median PV ( $2.5 \times 10^{-10} \text{ s}^{-2}$ ). Red contours are the 25 and 25.25  $\text{kg m}^{-3}$  isopycnals. b) Mode water thickness using the PV criteria (black) and density criteria (red) for the original time series and 24 h rolling mean. The coefficient of determination ( $r^2$ ) is 0.96 between these two methods. c) Mode water density using the PV criteria (black) and density criteria (red) for the original time series and 24 h rolling mean. The  $r^2$  is 0.89 between these two methods. d) Potential density layer thickness per 0.01  $\text{kg m}^{-3}$  bins in potential density space. Red lines are the 25 and 25.25  $\text{kg m}^{-3}$  isopycnals.

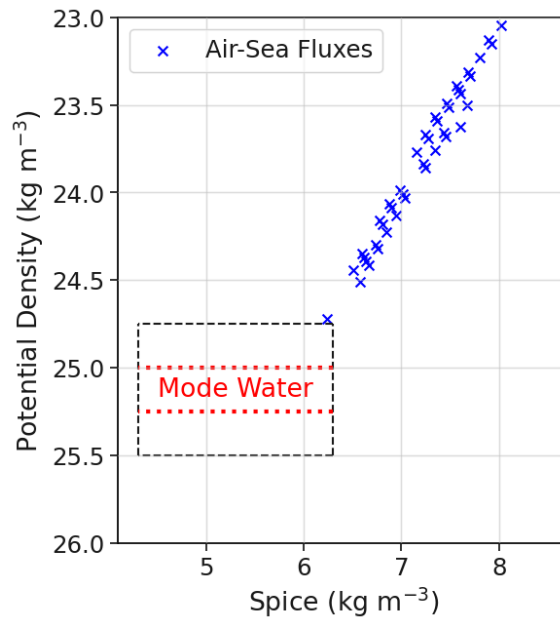

**Figure S2: Air-sea fluxes flag.** The volume of water bound by a given tracer surface will change by air–sea buoyancy fluxes if the tracer surface outcrops at the ocean surface. We compute the transformation in  $T$ - $S$  coordinates as per Evans et al. (2014, 2023) and retrieve the classes that change due to air–sea buoyancy fluxes. The  $T$ - $S$  classes are afterwards converted to  $\sigma$ - $\tau$  space and are marked as blue crosses. The box shows the  $\sigma$ - $\tau$  domain of interest for this study, and the red lines show the mode water potential density band, which lies below the classes affected by the air–sea interface. Air–sea buoyancy fluxes used were derived from the ERA5 reanalysis product (Hersbach et al., 2020), matched to the glider’s position and time for high-resolution analysis, and also retrieved as monthly climatological averages over the study area.

## References

- Evans, D. G., Zika, J. D., Naveira Garabato, A. C., and Nurser, A. J. G.: The imprint of Southern Ocean overturning on seasonal water mass variability in Drake Passage, *J. Geophys. Res.-Oceans*, 119, 7987–8010, <https://doi.org/10.1002/2014JC010097>, 2014.
- Evans, D. G., Holliday, N. P., Bacon, S., and Le Bras, I.: Mixing and air–sea buoyancy fluxes set the time-mean overturning circulation in the subpolar North Atlantic and Nordic Seas, *Ocean Sci.*, 19, 745–768, <https://doi.org/10.5194/os-19-745-2023>, 2023.
- Hersbach, H., Bell, B., Berrisford, P., Hirahara, S., Horányi, A., Muñoz-Sabater, J., Nicolas, J., Peubey, C., Radu, R., Schepers, D., Simmons, A., Soci, C., Abdalla, S., Abellan, X., Balsamo, G., Bechtold, P., Biavati, G., Bidlot, J., Bonavita, M., De Chiara, G., Dahlgren, P., Dee, D., Diamantakis, M., Dragani, R., Flemming, J., Forbes, R., Fuentes, M., Geer, A., Haimberger, L., Healy, S., Hogan, R. J., Hólm, E., Janisková, M., Keeley, S., Laloyaux, P., Lopez, P., Lupu, C., Radnoti, G., de Rosnay, P., Rozum, I., Vamborg, F., Villaume, S., and Thépaut, J. N.: The ERA5 global reanalysis, *Q. J. Roy. Meteor. Soc.*, 146, 1999–2049, <https://doi.org/10.1002/qj.3803>, 2020.
